# Supplementary material
Source: Springer Nature journal article supplement (https://www.springermedizin.de/resource/supplementary/13075_2012_3679_MOESM3_ESM.pdf/9695082)

● WAIT LIST/USUAL CARE    ◇ IMMEDIATE PRACTICE    △ DELAYED PRACTICE

### A. SF-36 Physical

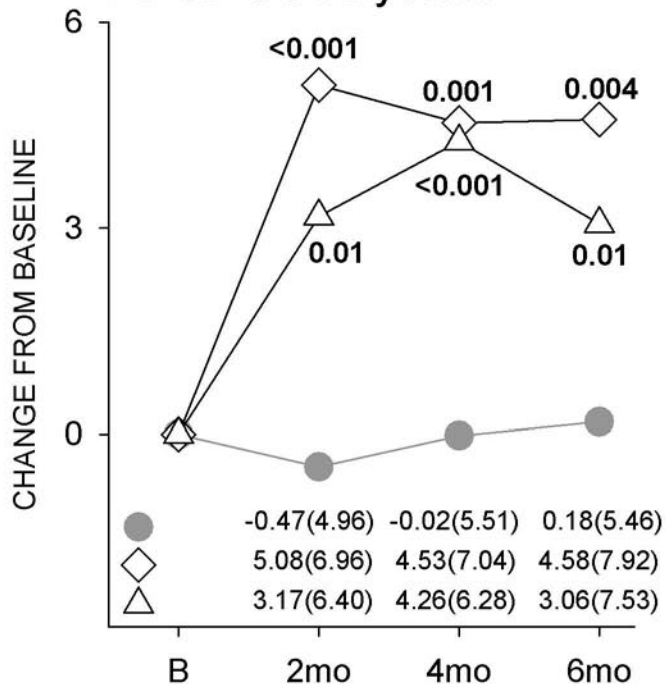

### B. SF-36 Mental

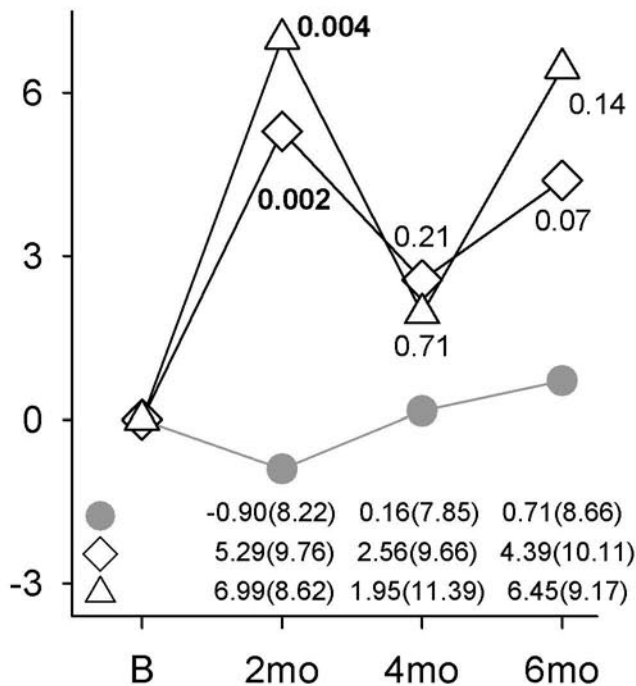

Supplement: MOESM3 [file 9695082]
